# Supplementary material for: Chrysanthemum morifolium Flower Extract Ameliorates Obesity-Induced Inflammation and Increases the Muscle Mitochondria Content and AMPK/SIRT1 Activities in Obese Rats
Source: MDPI journal article supplement (doi:10.3390/nu13103660), 2021-10-19
Supplement: s1 [file s1]

**Table S1.** The composition of experimental diets.

| Component (g / kg diet)                                                                                                                                                                                                                                                                                                                                                                                      |                  |                 |        |        |
|--------------------------------------------------------------------------------------------------------------------------------------------------------------------------------------------------------------------------------------------------------------------------------------------------------------------------------------------------------------------------------------------------------------|------------------|-----------------|--------|--------|
| <br>Copyright: © 2021 by the authors. Licensee MDPI, Basel, Switzerland. This article is an open access article distributed under the terms and conditions of the Creative Commons Attribution (CC BY) license ( <a href="https://creativecommons.org/licenses/by/4.0/">https://creativecommons.org/licenses/by/4.0/</a> ). | NOR <sup>1</sup> | HF <sup>2</sup> | CEL    | CEH    |
|                                                                                                                                                                                                                                                                                                                                                                                                              | -                | 170.73          | 170.73 | 170.73 |
|                                                                                                                                                                                                                                                                                                                                                                                                              | -                | 121.95          | 121.95 | 121.95 |
|                                                                                                                                                                                                                                                                                                                                                                                                              | -                | 155.00          | 155.00 | 155.00 |
|                                                                                                                                                                                                                                                                                                                                                                                                              | -                | 201.71          | 199.71 | 197.71 |
| Casein                                                                                                                                                                                                                                                                                                                                                                                                       | -                | 170.73          | 170.73 | 170.73 |
| Sucrose                                                                                                                                                                                                                                                                                                                                                                                                      | -                | 121.95          | 121.95 | 121.95 |
| Dextrose                                                                                                                                                                                                                                                                                                                                                                                                     | -                | 155.00          | 155.00 | 155.00 |
| Corn starch                                                                                                                                                                                                                                                                                                                                                                                                  | -                | 201.71          | 199.71 | 197.71 |
| Cellulose                                                                                                                                                                                                                                                                                                                                                                                                    | -                | 60.98           | 60.98  | 60.98  |
| Lard                                                                                                                                                                                                                                                                                                                                                                                                         | -                | 229.50          | 229.50 | 229.50 |
| Mineral mix <sup>2</sup>                                                                                                                                                                                                                                                                                                                                                                                     | -                | 42.68           | 42.68  | 42.68  |
| Vitamin mix <sup>3</sup>                                                                                                                                                                                                                                                                                                                                                                                     | -                | 12.20           | 12.20  | 12.20  |
| L-cystein                                                                                                                                                                                                                                                                                                                                                                                                    | -                | 2.20            | 2.20   | 2.20   |
| Choline bitartrate                                                                                                                                                                                                                                                                                                                                                                                           | -                | 3.05            | 3.05   | 3.05   |
| <i>Chrysanthemum morifolium</i> extract (CE)                                                                                                                                                                                                                                                                                                                                                                 | -                | -               | 2.0    | 4.0    |
| Total                                                                                                                                                                                                                                                                                                                                                                                                        | -                | 1000            | 1000   | 1000   |
| Energy density (kcal/g)                                                                                                                                                                                                                                                                                                                                                                                      | 3.1              | 4.6             | 4.6    | 4.6    |
| Carbohydrates (% as kcal)                                                                                                                                                                                                                                                                                                                                                                                    | 58               | 41.5            | 41.5   | 41.5   |
| Protein (% as kcal)                                                                                                                                                                                                                                                                                                                                                                                          | 24               | 13.5            | 13.5   | 13.5   |
| Fat (% as kcal)                                                                                                                                                                                                                                                                                                                                                                                              | 18               | 45.0            | 45.0   | 45.0   |

<sup>1</sup> Normal chow diet (Harlan 2018S rodent diet, Harlan US); <sup>2</sup> AIN-93G mineral mix; <sup>3</sup> AIN-93 vitamin mix. NOR, normal diet; HF, 45% high fat diet; CEL, HF with 0.2% *Chrysanthemum morifolium* extract (CE); CEH, HF with 0.4% *Chrysanthemum morifolium* extract (CE).

**Table S2.** Primers used for quantitative real time polymerase chain reaction.

| Name            | GeneBank No.   | Primer sequence (5'-3')                             |
|-----------------|----------------|-----------------------------------------------------|
| aP2             | NM_053365      | F: TCACCCCAGATGACAGGAAA<br>R: CATGACACATTCCACCACCA  |
| ACC             | NM_022193      | F: GAAAAGCGATTCCCATCCGC<br>R: CATTCCATGCAGTGGTCCCT  |
| ACLY            | BC100618.1     | F: GCCAGGGAGCTGGGTTTAAT<br>R: CACCACCAATGCCCATCTCT  |
| Arg1            | NM_017134.3    | F: ACATCGGCTTGCGAGATGTG<br>R: GCCAATTCCCAGCTTGTTCCA |
| $\beta$ -actin  | NM_031144      | F: GGCACCACACTTTCTACAAT<br>R: AGGTCTCAAACATGATCTGG  |
| CD11c           | XM_006230382.3 | F: CAGAACCCGTCACCCCAATG<br>R: GATGTCACAGCGGAAGTGCA  |
| C/EBP- $\alpha$ | NM_012524      | F: GCCAAGAAGTCGGTGGATAA<br>R: CGGTCAATGTCAGTGGTCAA  |
| CD36            | NM_031561      | F: CCTGTGAGTTGGCAAGAAGC<br>R: AATGAGCCCACAGTTCGGAT  |
| CPT1 $\alpha$   | NM_031559      | F: TCGGCAGACCTATTTTGCAC<br>R: ATTTGGCGTAGCTGTGCGATG |
| CPT1 $\beta$    | NM_013200      | F: TGTAAGTAGCGAGTCCACGGC<br>R: GGTGTTTTTCGGAGGCTTTC |
| DGAT2           | NM_001012345   | F: CGTGTGGCGCTATTTTCGAG<br>R: GGCCTTATGCCAGGGAACCT  |
| FAS             | NM_017332      | F: GCAGCAGCATGATGTAGCAC<br>R: AGTTGCACACCACAAGGTCA  |
| IL-6            | NM_012589      | F: ATAGTCCTTCCTACCCCAAC<br>R: TGCCGAGTAGACCTCATAGT  |
| iNOS            | NM_012611.3    | F: TCCTGCCACCTTGGAGTTCA<br>R: TGGTCACCTCCAGCACAAGA  |
| MCP1            | NM_031530      | F: ACTCACCTGCTGCTACTCAT<br>R: CTACAGCTTCTTTGGGACAC  |
| NRF1            | NM_01100708    | F: CTGTGGCTGATGGAGAGGTG<br>R: CACTGTTAAGGGCCATGGTG  |
| PGC1- $\alpha$  | NM_031347      | F: GCACCAGAAAACAGCTCCAA<br>R: TTAAGTGAAGTTGCCATCCCG |
| PPAR $\alpha$   | NM_013196      | F: TACCTGTGAACACGATCTGA<br>R: GCTAGTCTTTCCTGCGAGTA  |
| PPAR $\gamma$   | NM_001145366   | F: TGTGGGGATAAAGCATCAGG<br>R: CAAGGCACTTCTGAAACCGA  |
| SCD1            | NM_139192      | F: GTGGCAGGGCAGGAAATAGT<br>R: CAACACCACAAGAAGCCACG  |
| SIRT1           | XM_008772947   | F: AGGGAACCTCTGCCTCATCT<br>R: GAGGTGTTGGTGGCAACTCT  |
| SREBP-1c        | AF286470       | F: AGGAGGCCATCTTGTGCTT<br>R: GTTTTGACCCCTTAGGGCAGC  |
| Tfam            | NM_0311326     | F: TGGGCTTAGAGAAGGAAGCC<br>R: TGCTGACCGAGGTCTTTTG   |
| TNF- $\alpha$   | NM_012675      | F: CCCCTTATCGTCTACTCCT<br>R: ACTACTTCAGCGTCTCGTGT   |

aP2, adipocyte protein 2; ACC, acetyl-CoA carboxylase; ACLY, ATP citrate lyase; Arg1, arginase 1; CD11c, cluster of differentiation 11c; C/EBP- $\alpha$ , CCAAT/enhancer-binding protein- $\alpha$ ; CD36, cluster of differentiation 36; CPT1, carnitine / palmitoyl-transferase 1; DGAT2, diacylglycerol O-acyltransferase; FAS, fatty acid synthase; IL-6, interleukin-6; iNOS, inducible nitric oxide synthase; MCP1, monocyte chemoattractant protein 1; NRF1, nuclear respiratory factor 1; PGC-1 $\alpha$ , peroxisome proliferator-activated receptor gamma coactivator 1 $\alpha$ ; PPAR $\alpha$ , Peroxisome proliferator-activated receptor  $\alpha$ ; PPAR $\gamma$ , peroxisome proliferator-activated receptor  $\gamma$ ; SCD1, stearoyl-CoA desaturase 1; SIRT1, sirtuin 1; SREBP-1c, sterol regulatory element binding protein-1c; Tfam, transcription factor A; TNF- $\alpha$ , tumor necrosis factor- $\alpha$ .
